# Supplementary material for: Polymorphism in acesulfame sweetener: structure–property and stability relationships of bending and brittle crystals
Source: Royal Society of Chemistry journal article supplement (doi:10.1039/c0cc00028k), 2010-01-01
Supplement: c0cc00028k.pdf [file c0cc00028k.pdf]

## Polymorphism in acesulfame sweetener: Structure-property and stability relationships of bending and brittle crystals

Sitaram P. Velaga,<sup>\*a</sup> Venu R. Vangala,<sup>a,c</sup> Srinivas Basavoju,<sup>a</sup> and Dan Boström<sup>b</sup>

<sup>a</sup>*Department of Health Sciences, Luleå University of Technology, Luleå S-971 87, Sweden;*

<sup>b</sup>*Energy Technology and Thermal Process Chemistry, Umeå University, Umeå S-901 87, Sweden.*

<sup>c</sup>*Current Address: Institute of Chemical and Engineering Sciences, A\*STAR (Agency for Science, Technology and Research), 1 Pesek Road, Jurong Island, Singapore, 627833, Singapore.*

### Electronic Supplementary Information (ESI)

(10 pages)

#### Table of contents

|                                                                                         |     |
|-----------------------------------------------------------------------------------------|-----|
| (i) Preparation of neutral acesulfame                                                   | S1  |
| (ii) Thermal profiles of acesulfame needle and prismatic crystals                       | S2  |
| (iii) Vibrational spectroscopy for Forms I and II                                       | S3  |
| (iv) ORTEP plots, overlay of conformations, hydrogen bond geometries for Forms I and II | S4  |
| (v) Face indexing for acesulfame Forms I                                                | S5  |
| (vi) Simulated PXRD patterns for Forms I and II                                         | S6  |
| (vii) Product phase of Form II quenched at 110°C                                        | S7  |
| (viii) Slurry of acesulfame - product phases DSC and PXRD                               | S8  |
| (ix) DSC profile of heat-cool-heat for Form II                                          | S9  |
| (x) Lattice energy calculations for Forms I and II                                      | S10 |

### S1. Neutralization of Acesulfame potassium (Ace K).

It was obtained from Sigma Aldrich at a stated purity of 99% and no attempt was made at further purification. Ace K (5 g) was dissolved in water (5 mL), neutralized with concentrated HCl (5 mL) and achieved the highly acidic solution of  $\sim \text{pH} = 2$  and extracted with ethyl acetate (15 mL). Up on routine work up afforded a white solid of salt free acesulfame. It was crystallized from EtOAc by slow evaporation at the ambient conditions. Needle crystals were yielded. Mp: 122-124 °C.

### S2 DSC and TGA for the needle and the prismatic crystals.

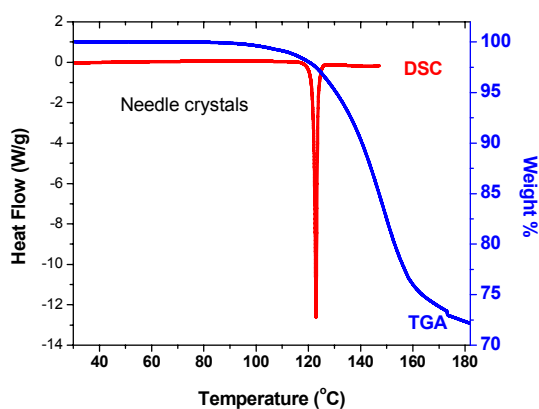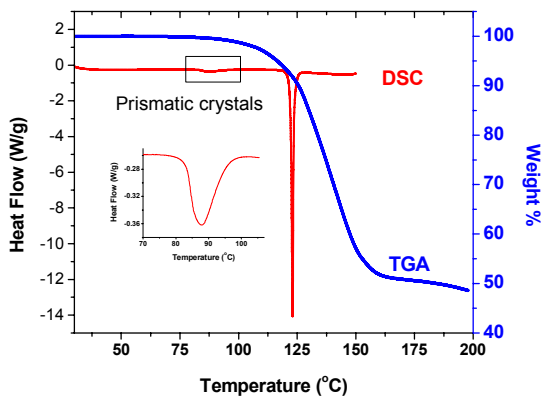

**S3a.** Raman vibrational spectroscopy for acesulfame Form I.

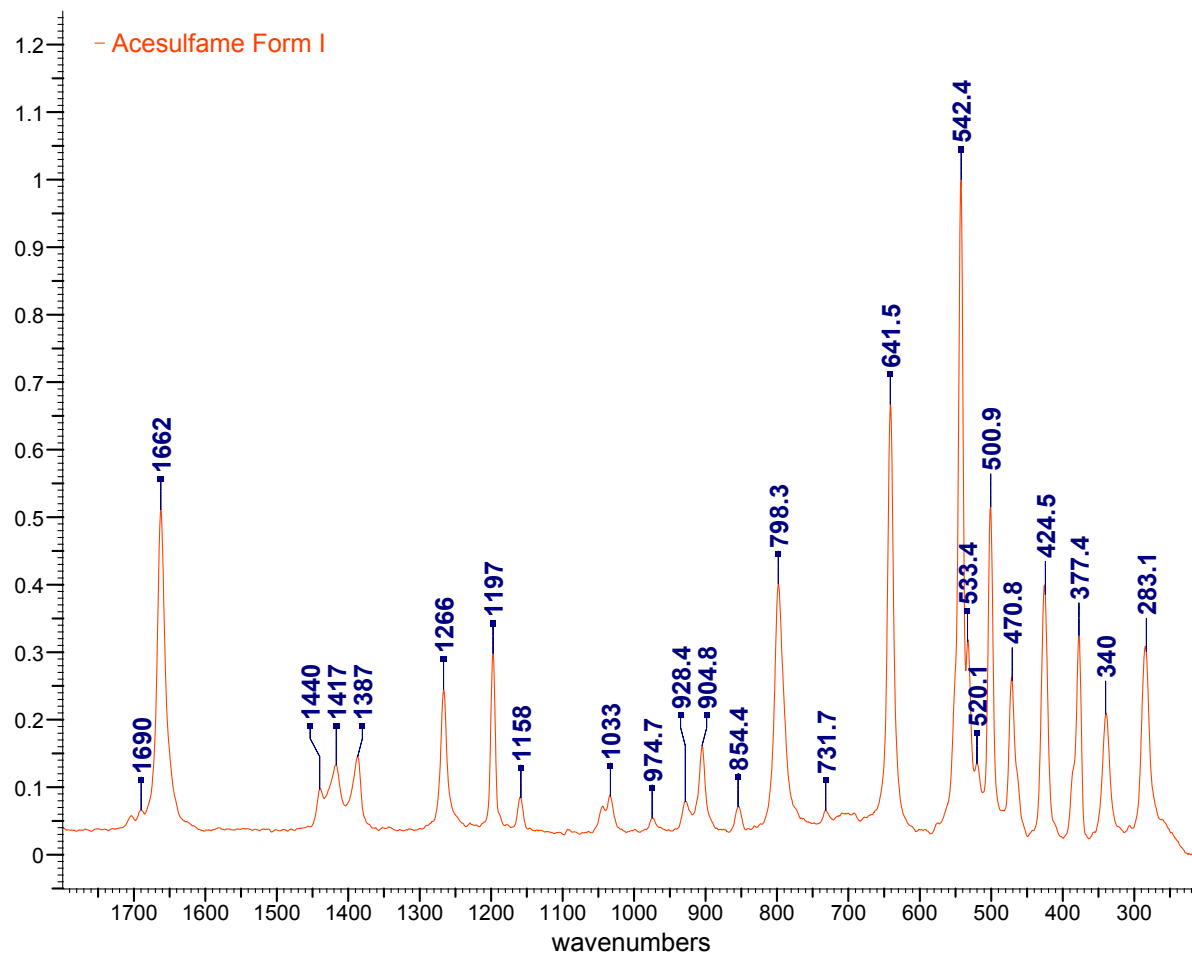

**S3b** Raman vibrational spectroscopy for acesulfame Form II.

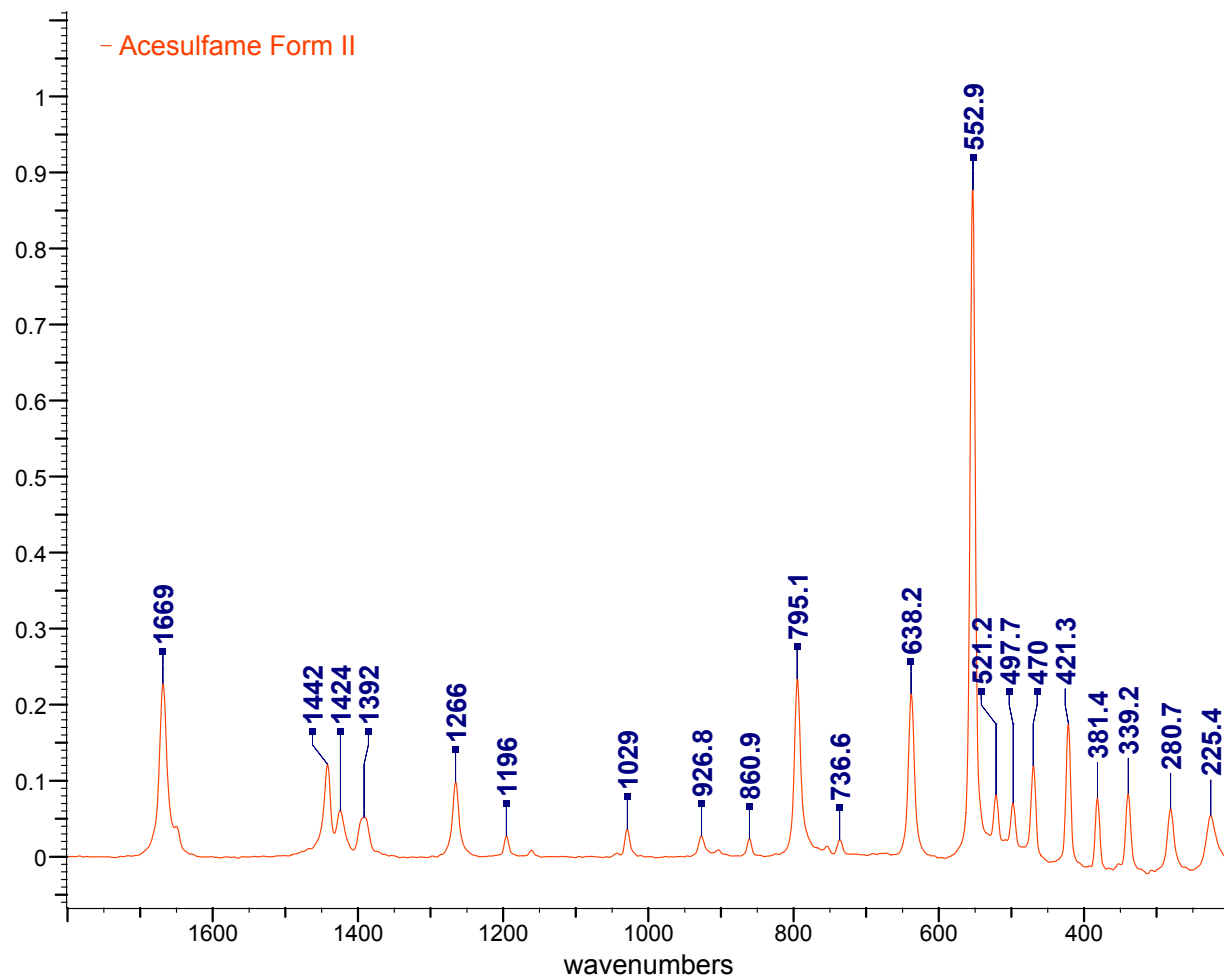

**S4a** ORTEP plots at the 50% probability level. Two and one independent molecules in the asymmetric unit of Forms **I** and **II** respectively.

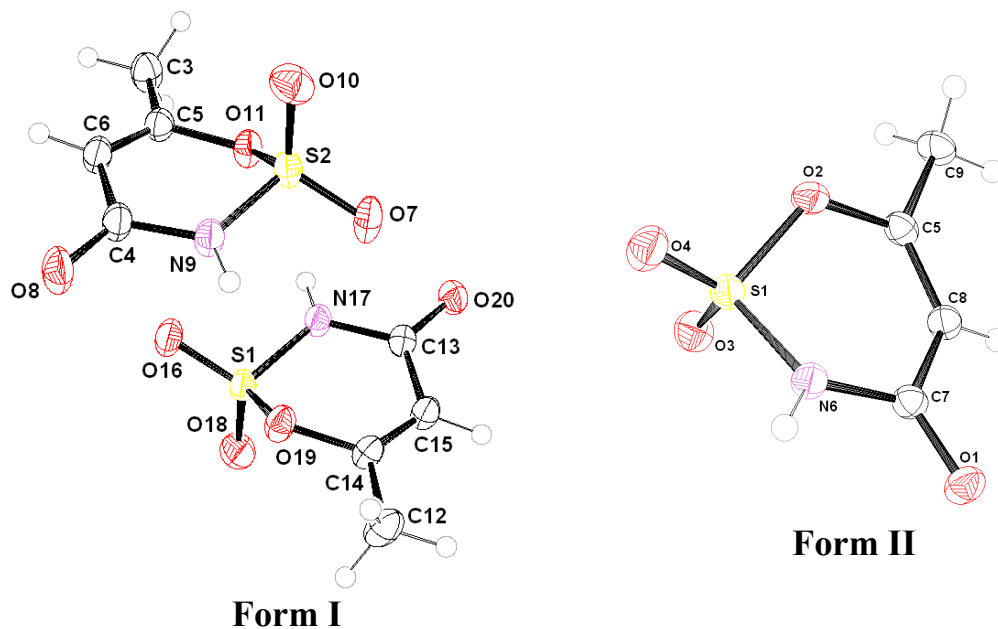

**S4b** Molecular conformations of acesulfame Forms **I** and **II**. While Form **I** adopts two different conformations (Blue and Green), Form **II** conformation (pink) was similar to one of the independent molecules of Form **I** (Blue).

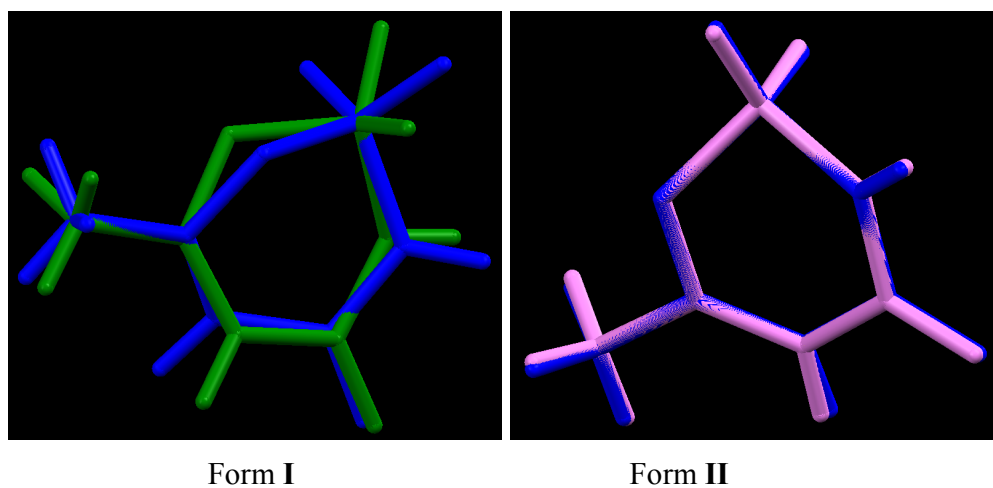

**S4c** Hydrogen bond geometries for Forms I and II.<sup>a</sup>

| D–H...A        | $d(\text{H}\cdots\text{A})/\text{Å}$ | $d(\text{D}\cdots\text{A})/\text{Å}$ | $\angle(\text{D}-\text{H}\cdots\text{A})/\text{°}$ | Symmetry code    |
|----------------|--------------------------------------|--------------------------------------|----------------------------------------------------|------------------|
| <b>Form I</b>  |                                      |                                      |                                                    |                  |
| N–H...O        | 1.74                                 | 2.7349(19)                           | 169                                                | 2-x,-1/2+y,1/2-z |
| N–H...O        | 1.77                                 | 2.717(2)                             | 156                                                | 1-x,1/2+y,1/2-z  |
| C–H...O        | 2.29                                 | 3.341(2)                             | 163                                                | -1+x,y,z         |
| C–H...O        | 2.37                                 | 3.372(2)                             | 153                                                | x,1/2-y,1/2+z    |
| C–H...O        | 2.39                                 | 3.338(3)                             | 145                                                | 2-x,-1/2+y,1/2-z |
| C–H...O        | 2.41                                 | 3.436(3)                             | 157                                                | 1+x,y,z          |
| C–H...O        | 2.63                                 | 3.634(3)                             | 155                                                | 1-x,1/2+y,1/2-z  |
| C–H...O        | 2.66                                 | 3.552(2)                             | 140                                                | 1+x,y,z          |
| C–H...O        | 2.69                                 | 3.583(2)                             | 139                                                | -1+x,y,z         |
| C–H...O        | 2.70                                 | 3.547(2)                             | 135                                                | 1-x,-y,1-z       |
| <b>Form II</b> |                                      |                                      |                                                    |                  |
| N–H...O        | 1.77                                 | 2.7722(18)                           | 169                                                | 1-x,1-y,-z       |
| C–H...O        | 2.49                                 | 3.516(2)                             | 157                                                | x,-1+y,z         |
| C–H...O        | 2.65                                 | 3.395(2)                             | 125                                                | 1-x,-y,1-z       |
| C–H...O        | 2.67                                 | 3.604(2)                             | 145                                                | -x,-y,-z         |
| C–H...O        | 2.68                                 | 3.665(2)                             | 151                                                | -x,-y,1-z        |

<sup>a</sup>N-H and C-H geometries were normalized.

**S5** Face indexing of acesulfame Forms I.

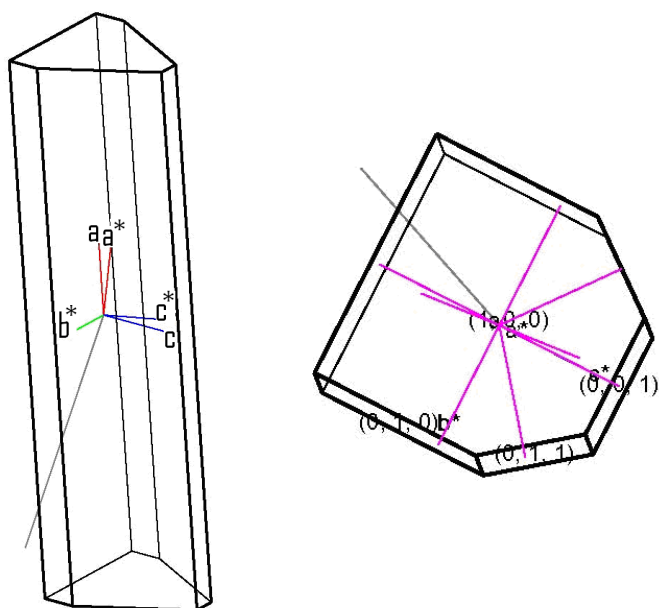

**S6** Simulated X-ray powder patterns obtained from the single crystal structures of Forms I and II.

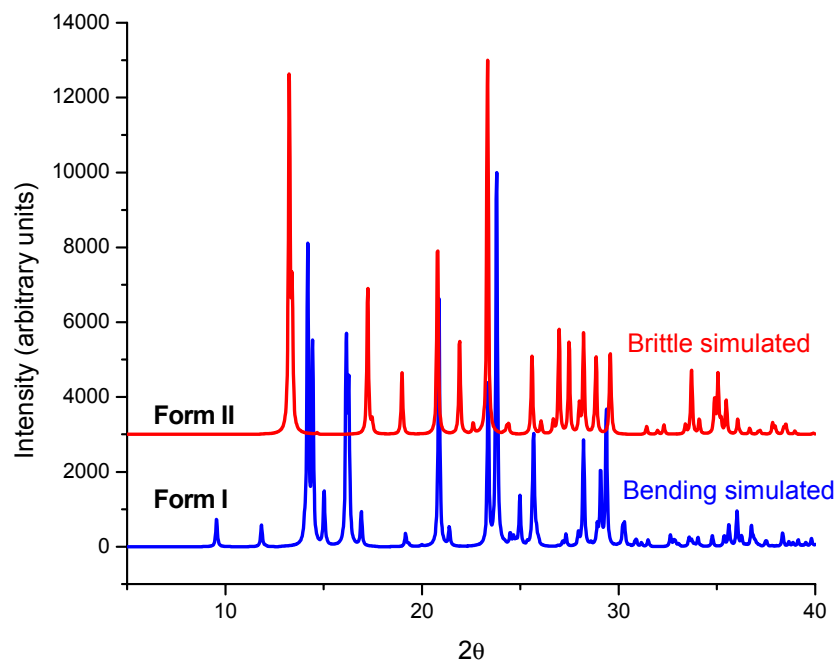

**S7** Form II quenched at 110 °C and recorded the PXRD. It was shown to be Form I.

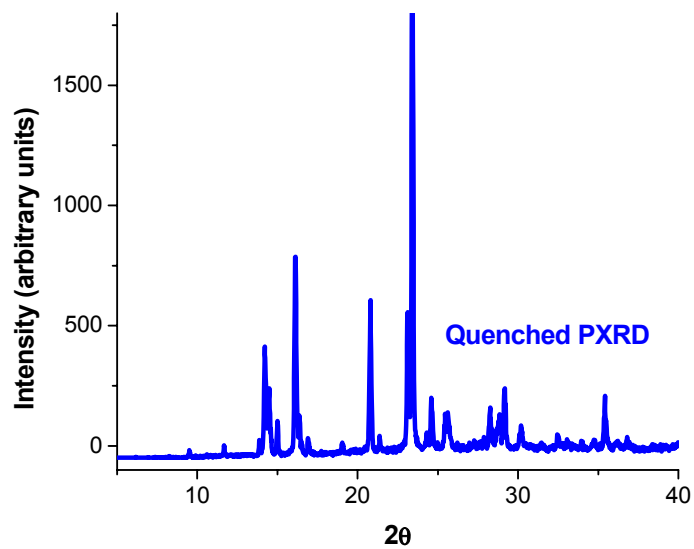

**S8a** Slurry of Forms I and II. Product phase PXRD shown to be Form I.

A 50:50 (w/w) mixture of Forms I and II was stirred in CH<sub>3</sub>OH at room temperature RT for 72h and the filtrate was dried at 30 °C for 24h

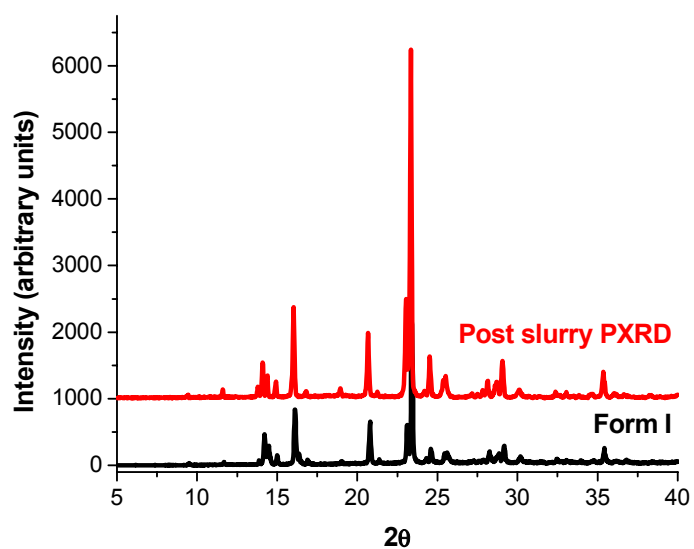



**S8b** DSC trace for the product phase from the slurry experiment. Note the complete transformation to Form I.

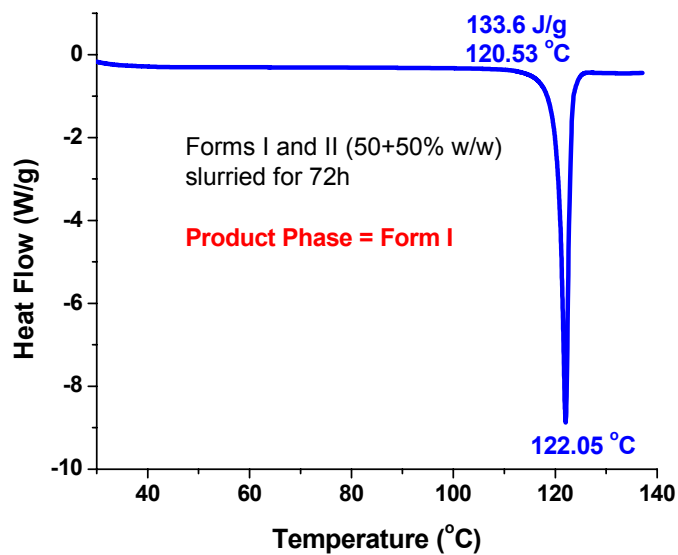

**S9** DSC profile of heat-cool-heat for Form II. It suggests that enantiotropic transformation is non-interconvertible under the investigated conditions.

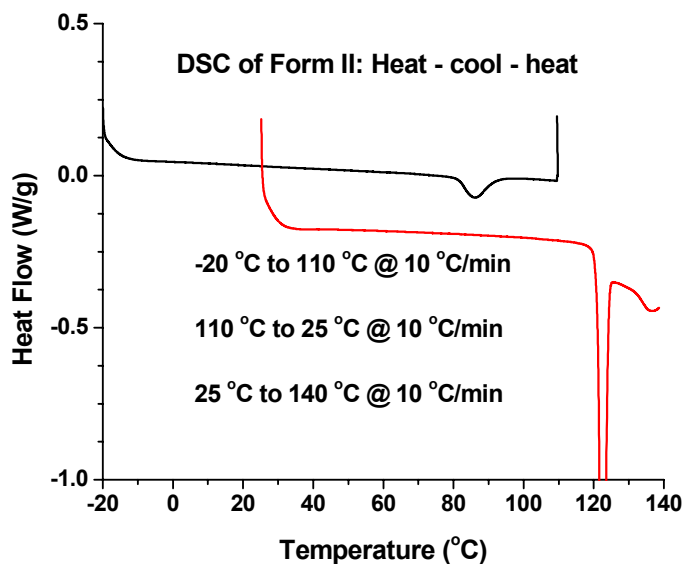

### **S10. Lattice energy calculations for Forms I and II**

Lattice energy calculation for Forms I and II was performed using the Forcite module in the Materials Studio. Single crystal X-ray structure co-ordinates were minimized by the COMPASS force field. The charges were assigned by the force field. The Ewald summation employed to compute the non-bonded interactions that include van der Waals and electrostatic interactions. Finally, lattice energies were computed per molecule based on the number of molecules present in the unit cell (See also: A. Nangia, *Acc. Chem. Res.* 2008, **41**, 595-604 and references cited there in).
